## PERSPECTIVAS

### EDITORIALES

- 609 Estimulación del nervio vago: Regreso al futuro**  
*J. Douglas Bremner, M.D., Mark Hyman Rapaport, M.D.*
- 611 Aprovechar el poder de la mirada a través de la música**  
*Susan Ball, Ph.D.*
- 613 Los correlatos neurales de las dimensiones transdiagnósticas de la psicopatología**  
*Deanna M. Barch, Ph.D.*
- 616 Diabetes y esquizofrenia: Nuevos hallazgos para un viejo problema**  
*Ole A. Andreassen, M.D., Ph.D.*

### INTROSPECCIÓN

- 618 Amigos**  
*Cornelius Gropp, M.D.*

### CONFERENCIA DE CASO CLÍNICO

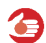

- 620 Complicaciones psiquiátricas de hiperparatiroidismo primario e hipercalcemia leve**  
*Kristin A. Parks, D.O., et al.* **EMC • AUDIO • GUÍAS CLÍNICAS**

### PERSPECTIVAS EN SALUD MENTAL GLOBAL

- 623 DREAMers (Soñadores) y su doble calidad de vida en los Estados Unidos: Una perspectiva contextual y sus implicaciones clínicas**  
*Luz M. Garcini, Ph.D., M.P.H., et al.*

### IMÁGENES EN PSIQUIATRÍA

- 626 Vincent Van Gogh (1853–1890): Experimentando la Locura**  
*Peter J. Buckley, M.D.*

### RESÚMENES Y RESEÑAS

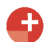

- 628 Estimulación transcraneal de corriente de baja intensidad en psiquiatría**  
*Noah S. Philip, M.D., et al.* **AUDIO • GUÍAS CLÍNICAS**

## NUEVAS INVESTIGACIONES

### ARTÍCULOS

- 640 Un estudio de observación a 5 años de pacientes con depresión resistente al tratamiento tratados con estimulación del nervio vago o tratamiento habitual: Comparación de respuesta, remisión y tendencias al suicidio**  
*Scott T. Aaronson, M.D., et al.* **EDITORIAL • AUDIO • GUÍAS CLÍNICAS**
- 649 Tratamiento de contingencia de la mirada fija con recompensa de música para el trastorno de ansiedad social: Un ensayo controlado aleatorizado**  
*Amit Lazarov, Ph.D., et al.* **EDITORIAL • EMC • AUDIO**
- 657 Déficits dimensionales comunes de recompensa en los trastornos del ánimo y psicóticos: Un estudio de asociación del conectoma completo**  
*Anup Sharma, M.D., Ph.D., et al.* **EDITORIAL • VIDEO**

- 667 Neuroimágenes multimodales de la estructura fronto-límbica y función asociada con los intentos de suicidio en adolescentes y adultos jóvenes con trastorno bipolar**  
Jennifer A.Y. Johnston, M.A., et al. EDITORIAL • EMC • AUDIO
- 676 Identificación de alteraciones comunes del circuito neural en el control cognitivo en trastornos psiquiátricos**  
Lisa M. McTeague, Ph.D., et al. EDITORIAL • VIDEO
- 686 Riesgos endógeno y relacionado con los antipsicóticos de diabetes mellitus en personas jóvenes con esquizofrenia: Un estudio de cohorte danés basado en la población**  
Anto P. Rajkumar, M.D., D.N.B., M.R.C.Psych., Ph.D., et al. EDITORIAL • AUDIO • GUÍAS CLÍNICAS

## COMUNICADOS Y ACTUALIZACIONES

### CARTAS AL EDITOR

- 695 Una encuesta del uso clínico no aprobado de la ketamina como tratamiento para los trastornos psiquiátricos**  
Samuel T. Wilkinson, M.D., et al.
- 696 Altas tasas de respuesta al placebo dificultan el descubrimiento de antidepresivos para la depresión en niños y adolescentes**  
Lujin Li, Ph.D., et al.

### RESEÑAS BIBLIOGRÁFICAS

- 698 IACAPAP Textbook of Child and Adolescent Mental Health [Manual IACAPAP de salud mental de niños y adolescentes]**  
Juan David Palacio, M.D., M.Sc.
- 698 Computational Psychiatry: New Perspectives on Mental Illness [Psiquiatría computacional: Nuevas perspectivas de la salud mental]**  
Tali M. Ball, Ph.D., Andrea N. Goldstein-Piekarski, Ph.D.
- 700 Libros Recibidos**

### ACTOS OFICIALES

- 701 Informes a los socios**

## OTROS TEMAS DE INTERÉS

### 713 Educación Médica Continuada

**Cubierta:** [In this month's "Images in Psychiatry" (p. 626), Peter J. Buckley, M.D., discusses Vincent van Gogh's time in the asylum of Saint-Remy. The fields and buildings once painted by Van Gogh are now a highly photographed destination for visitors. Photo of the medieval Monastery Saint-Paul de Mausole and its garden in Saint-Remy-de-Provence, France, by Efesenko at iStockphoto.com.]

Article content that addresses **Core Competencies**, defined by the Accreditation Council of Graduate Medical Education and the American Board of Medical Specialties, is indicated by the following symbols:

- |                                                                                                                            |                                                                                                                             |
|----------------------------------------------------------------------------------------------------------------------------|-----------------------------------------------------------------------------------------------------------------------------|
|  Professionalism                        |  Patient Care and Procedural Skills      |
|  Medical Knowledge                      |  Practice-Based Learning and Improvement |
|  Interpersonal and Communication Skills |  Systems-Based Practice.                 |

More information is available at [www.abms.org/maintenance\\_of\\_certification/MOC\\_competencies.aspx](http://www.abms.org/maintenance_of_certification/MOC_competencies.aspx)

- AUDIO** Highlighted in AJP Audio, a downloadable .mp3 file available at [ajp.psychiatryonline.org](http://ajp.psychiatryonline.org)
- EMC** A course covering the content of this article is available online for paid subscribers to the AJP EMC Course program
- EDITORIAL** Discussed in one of the issue's editorials
- GUÍAS CLÍNICAS** Guías clínicas provided on the English table of contents
- VIDEO** Highlighted online by Deputy Editor Daniel S. Pine, M.D.

### La Tabla de Contenidos y resúmenes de Este Número Está Disponible en Español

(This issue's Table of Contents and abstracts are available in Spanish)

Translation presented in collaboration with the Office of Global Health, Rutgers-Robert Wood Johnson Medical School

Support for this effort provided by ACTA Colombia.

#### Translation courtesy of

**Sergi Casals, M.A.**, Garuna, Medellín, Colombia ([www.garunaeditors.com](http://www.garunaeditors.com))

**Carlos Lopez Jaramillo, M.D.**, Universidad de Antioquia, Medellín, Colombia

**Javier I. Escobar, M.D., M.Sc.**, Rutgers-Robert Wood Johnson Medical School

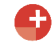

## Estimulación transcraneal de corriente de baja intensidad en psiquiatría

Noah S. Philip, M.D., Brent G. Nelson, M.D., Flavio Frohlich, Ph.D., Kelvin O. Lim, M.D., Alik S. Widge, M.D., Ph.D., Linda L. Carpenter, M.D.

La neuroestimulación se está convirtiendo rápidamente en una modalidad importante de tratamiento para los trastornos psiquiátricos. Uno de los enfoques de mayor rendimiento y menos regulado para la estimulación terapéutica no invasiva implica la aplicación de corrientes eléctricas débiles. El entusiasmo generalizado por la estimulación transcraneal de corriente eléctrica (tCS) se refleja en el reciente aumento del mercadeo de dispositivos directamente al consumidor, el entusiasmo de «hágalo Usted mismo» y un número de ensayos clínicos que va en aumento. A raíz de este rápido crecimiento, es posible que los clínicos carezcan de información suficiente sobre tCS para informar sus prácticas clínicas. La interpretación de los datos de ensayos clínicos con tCS se apoya en la familiaridad con los principios neurofisiológicos básicos, los potenciales mecanismos de acción de la tCS y la complicada historia reguladora que rige los dispositivos de tCS. Una creciente literatura incluye ensayos aleatorizados de tCS para depresión mayor, esquizofrenia, trastornos cog-

nitivos y trastornos por consumo de sustancias. La relativa facilidad de uso de la tCS y el abundante acceso a la misma pueden representar un avance importante y de amplio alcance para la futura atención en salud mental. La evidencia apoya la aplicación de un tipo de tCS, la estimulación transcraneal con corriente directa (tDCS), para la depresión mayor. Sin embargo, los dispositivos de tDCS no tienen aprobación regulatoria para tratar trastornos médicos, la evidencia es en su mayor parte no concluyente para otras áreas terapéuticas y su uso está asociado con algunos riesgos físicos y psiquiátricos. Un hallazgo inesperado que puede surgir de esta revisión es que el uso de dispositivos de estimulación de electroterapia craneal—la única categoría de dispositivos de tCS con uso autorizado en trastornos psiquiátricos—se apoya en evidencia de baja calidad.

(*Am J Psychiatry* 2017; 174:628–639)

## Un estudio de observación a 5 años de pacientes con depresión resistente al tratamiento tratados con estimulación del nervio vago o tratamiento habitual: Comparación de respuesta, remisión y tendencias al suicidio

Scott T. Aaronson, M.D., Peter Sears, C.C.R.P., Francis Ruvuna, Ph.D., Mark Bunker, Pharm.D., Charles R. Conway, M.D., Darin D. Dougherty, M.D., Frederick W. Reimherr, M.D., Thomas L. Schwartz, M.D., John M. Zajecka, M.D.

**Objetivo:** El Registro de Depresión Resistente al Tratamiento investigó si la estimulación del nervio vago (ENV) adyuvante con el tratamiento habitual en depresión tiene resultados a largo plazo superiores a los que se obtienen con solamente el tratamiento habitual.

**Método:** Este estudio de observación de registros, a 5 años, prospectivo, de etiqueta abierta y no aleatorizado se llevó a cabo en 61 sitios en Estados Unidos e incluyó 795 pacientes que estaban sufriendo un episodio depresivo mayor (depresión unipolar o bipolar) de como mínimo 2 años de duración o que habían tenido tres episodios depresivos o más (incluyendo el episodio en curso), y que habían seguido cuatro o más tratamientos de depresión sin éxito (incluyendo TEC). Se excluyeron los pacientes con historial de psicosis o de trastorno bipolar de ciclado rápido. La medida de eficacia primaria fue la tasa de respuesta, definida como una reducción del  $\geq 50\%$  en la puntuación en la Escala de Evaluación de Depresión de Montgomery-Åsberg (MADRS) en cualquier visita a lo largo de los 5 años del estudio, con respecto a la puntuación obtenida al inicio del estudio (línea de base). Las medidas de eficacia secundarias incluyeron la remisión.

**Resultados:** Los pacientes sufrían depresión crónica con severidad entre moderada y severa al comienzo del estudio (la

puntuación media en la escala MADRS fue 29,3 [DE=6,9] para el grupo del tratamiento habitual y 33,1 [DE=7,0] para el grupo con ENV adyuvante). Los resultados del registro indican que el grupo con ENV adyuvante obtuvo mejores resultados clínicos que el grupo con tratamiento habitual, incluyendo una tasa más alta de respuesta acumulativa a 5 años (67,6% en comparación con 40,9%) y una tasa de remisión significativamente más alta (remisión acumulativa por primera vez, 43,3% vs. 25,7%) Un análisis secundario demostró que entre los pacientes con un historial de respuesta a la TEC, los que estaban en el grupo con TEC adyuvante tuvieron una respuesta acumulativa de 5 años más alta que los que estaban en el grupo con tratamiento habitual (71,3% en comparación con 56,9%). Se observó un diferencial de respuesta similar entre los que no respondieron a la TEC (59,6% vs. 34,1%).

**Conclusiones:** Este registro representa el estudio naturalístico más grande y de mayor duración de resultados de eficacia en la depresión resistente al tratamiento y ofrece evidencia adicional de que la ENV adyuvante realza los efectos de los antidepresivos en comparación con el tratamiento habitual en esta población con una enfermedad tan grave.

(*Am J Psychiatry* 2017; 174:640–648)

# Terapia de contingencia de la mirada fija con recompensa de música para el trastorno de ansiedad social: Un ensayo controlado aleatorizado

Amit Lazarov, Ph.D., Daniel S. Pine, M.D., Yair Bar-Haim, Ph.D.

**Objetivo:** Los pacientes con trastorno de ansiedad social han demostrado fijar más su atención en las amenazas sociales, convirtiéndose así en un objetivo viable para la terapéutica. Este ensayo controlado aleatorizado examinó la eficacia de una novedosa terapia de contingencia de la mirada fija con recompensa de música para el trastorno de ansiedad social, diseñada para disminuir la fijación de la atención en las amenazas.

**Método:** Cuarenta pacientes con trastorno de ansiedad social fueron asignados aleatoriamente o bien a ocho sesiones de terapia de contingencia de la mirada fija con recompensa de música, diseñada para distraer la mirada de los pacientes hacia estímulos neutrales en lugar de hacia estímulos de amenazas, o bien a una condición control. Las medidas de ansiedad social reportadas por los clínicos o auto-reportadas por los propios pacientes se obtuvieron en el pre-tratamiento, en el post-tratamiento y en una visita de seguimiento a los 3 meses. Se evaluó el tiempo de fijación en los rostros socialmente amenazadores durante las sesiones de entrenamiento y antes y después del tratamiento.

**Resultados:** La terapia de contingencia de la mirada fija con recompensa de música dio como resultado una mayor dis-

minución de los síntomas del trastorno de ansiedad social, en comparación con la condición control, tanto en las medidas reportadas por los clínicos como en las auto-reportadas por los pacientes. Los efectos terapéuticos se mantuvieron iguales en el seguimiento. La terapia de contingencia de la mirada fija con recompensa de música, pero no la condición control, también redujo el tiempo de fijación en las amenazas, que mediaron parcialmente los efectos clínicos. Por último, la terapia de contingencia de la mirada fija con recompensa de música, pero no la condición control, también alteró el tiempo de fijación en los rostros socialmente amenazadores que no se utilizaron en el entrenamiento, reflejando una generalización de casi-transferencia del entrenamiento.

**Conclusiones:** Este es el primer ensayo controlado aleatorizado que examina una intervención de contingencia de la mirada fija en el trastorno de ansiedad social. Los resultados demuestran reclutamiento del número esperado de sujetos y respuesta terapéutica. Este estudio crea el marco para ensayos aleatorizados más grandes y evaluación en otros trastornos emocionales.

(*Am J Psychiatry* 2017; 174:649–656)

## Déficits dimensionales comunes de recompensa en los trastornos del ánimo y psicóticos: Un estudio de asociación del conectoma completo

Anup Sharma, M.D., Ph.D., Daniel H. Wolf, M.D., Ph.D., Rastko Ciric, B.A., Joseph W. Kable, Ph.D., Tyler M. Moore, Ph.D., Simon N. Vandeckar, B.S., Natalie Katchmar, B.S., Aylin Daldal, B.A., Kosha Ruparel, M.S.E., Christos Davatzikos, Ph.D., Mark A. Elliott, Ph.D., Monica E. Calkins, Ph.D., Russell T. Shinohara, Ph.D., Danielle S. Bassett, Ph.D., Theodore D. Satterthwaite, M.D., M.A.

**Objetivo:** La anhedonia es un problema central de múltiples trastornos psiquiátricos y causa una incapacidad considerable. Una conceptualización dimensional plantea que la severidad de la anhedonia está relacionada con un continuo transdiagnóstico de déficits de recompensa en redes neurales específicas. Estudios anteriores de conectividad funcional relacionados con la anhedonia se han centrado en comparaciones entre casos y controles en trastornos específicos, utilizando análisis de regiones específicas basados en "semilleros" ("seed-based"). Aquí, los autores exploran el conectoma funcional completo en relación a la respuesta a la recompensa en una población de adultos con psicopatología heterogénea.

**Método:** En una muestra de 225 adultos de cinco grupos diagnósticos (trastorno depresivo mayor, N=32; trastorno bipolar, N=50; esquizofrenia, N=51; riesgo de psicosis, N=39; y sujetos sanos de control, N=53), los autores llevaron a cabo un análisis del conectoma completo y examinaron la relación entre una medida dimensional de respuesta a la recompensa (la sub-escala de sensibilidad a la recompensa de la Escala de Activación Comportamental) y la conectividad funcional en estado de reposo utilizando regresión matricial multivariada basada en distancias.

**Resultados:** Los autores identificaron focos de desconexión asociados con la respuesta a la recompensa en el núcleo accumbens, la red del modo por defecto y la red cíngulo-opercular. Análisis de seguimiento revelaron desconexión entre redes funcionales de gran escala específicas y su conectividad con el núcleo accumbens. Los déficits de recompensa se asociaron con conectividad reducida entre el núcleo accumbens y la red del modo por defecto, y con conectividad aumentada entre el núcleo accumbens y la red cíngulo-opercular. Adicionalmente, la respuesta deteriorada a las recompensas se asoció con hiper-conexión de la red del modo por defecto y conectividad reducida entre la red del modo por defecto y la red cíngulo-opercular.

**Conclusiones:** Estos resultados resaltan la centralidad del núcleo accumbens en la fisiopatología de los déficits de recompensa y sugieren que los patrones dissociables de conectividad entre redes de gran escala son críticos para la neurobiología de la disfunción en recompensas en las diferentes categorías diagnósticas.

*(Am J Psychiatry 2017; 174:657–666)*

## Neuroimágenes multimodales de la estructura fronto-límbica y función asociada con los intentos de suicidio en adolescentes y adultos jóvenes con trastorno bipolar

Jennifer A.Y. Johnston, M.A., Fei Wang, M.D., Ph.D., Jie Liu, Ph.D., Benjamin N. Blond, M.D., Amanda Wallace, M.D., Jiacheng Liu, M.D., Ph.D., Linda Spencer, B.S., Elizabeth T. Cox Lippard, Ph.D., Kirstin L. Purves, B.Sc., Angeli Landeros-Weisenberger, M.D., Eric Hermes, M.D., Brian Pittman, M.S., Sheng Zhang, Ph.D., Robert King, M.D., Andrés Martín, M.D., M.P.H., Maria A. Oquendo, M.D., Hilary P. Blumberg, M.D.

**Objetivo:** El trastorno bipolar está asociado con un alto riesgo de comportamiento suicida que a menudo se desarrolla en la adolescencia y el inicio de la edad adulta. Es crítico dilucidar los sistemas neurales implicados para la prevención. Este estudio de adolescentes y adultos jóvenes con trastorno bipolar con y sin historial de intentos suicidas combina métodos de imágenes IRM estructural, con tensor de difusión y funcional para investigar las anomalías implicadas en la morfología y la conectividad estructural y funcional en los sistemas fronto-límbicos.

**Método:** El estudio tuvo 26 participantes con trastorno bipolar que tuvieron un intento de suicidio previo (el grupo con intento de suicidio) y 42 participantes con trastorno bipolar sin ningún intento de suicidio (el grupo sin intento de suicidio). Se comparó el volumen de la sustancia gris regional, la integridad de la sustancia blanca y la conectividad durante el procesamiento de estímulos emocionales de los dos grupos, y se exploraron las diferencias para las relaciones entre las modalidades de neuroimágenes y las asociaciones con síntomas y comportamientos relacionados con el suicidio.

**Resultados:** En comparación con el grupo sin intento de sui-

cidio, el grupo con intento de suicidio mostró reducciones significativas del volumen de la sustancia gris en la corteza orbitofrontal, el hipocampo y el cerebelo; integridad de la sustancia blanca en el fascículo uncinado, las regiones del cerebelo derecha y ventral frontal; y conectividad funcional de la amígdala con la corteza prefrontal ventral izquierda y rostral derecha. En análisis exploratorios, entre los sujetos con intento de suicidio, hubo una correlación negativa significativa entre la conectividad prefrontal rostral derecha y la ideación suicida, y entre la conectividad prefrontal ventral izquierda y la letalidad del intento.

**Conclusiones:** Los adolescentes y adultos jóvenes con trastorno bipolar que cometen intentos de suicidio demuestran un volumen inferior de sustancia gris, y conectividad funcional y estructural reducida en un sistema neural fronto-límbico ventral al servicio de la regulación emocional. Entre los sujetos con intento de suicidio, la reducción de la conectividad funcional prefrontal-amígdala puede estar asociada con la severidad de la ideación suicida y la letalidad de los intentos.

(*Am J Psychiatry* 2017; 174:667–675)

## Identificación de alteraciones comunes del circuito neural en el control cognitivo en trastornos psiquiátricos

Lisa M. McTeague, Ph.D., Julia Huemer, M.D., David M. Carreon, M.D., Ying Jiang, M.D., Simon B. Eickhoff, Dr.Med., Amit Etkin, M.D., Ph.D.

**Objetivo:** Los déficits cognitivos son una característica común de los trastornos psiquiátricos. Los autores investigaron la naturaleza de las alteraciones en los circuitos neurales que subyacen las capacidades de control cognitivo en trastornos psiquiátricos por medio de un meta-análisis de neuroimágenes en los diferentes diagnósticos.

**Método:** Se llevó a cabo una búsqueda en *PubMed* de artículos de neuroimágenes funcionales del cerebro completo, publicados hasta junio de 2015, que compararan la activación en pacientes con trastornos de eje I y participantes sanos de control para compararlos, durante la realización de tareas de control cognitivo. Se incluyeron las tareas que examinaban el desempeño o el monitoreo de conflictos, la inhibición o selección de respuesta, el cambio de escenario, la fluidez verbal, y la memoria de trabajo o reconocimiento. Se realizaron meta-análisis de estimación de probabilidad de activación en coordenadas de vóxel culminantes.

**Resultados:** Los 238 experimentos sometidos a meta-análisis incluían 5.728 participantes control y 5.493 pacientes con varios trastornos (esquizofrenia, depresión bipolar o unipolar, trastornos de ansiedad y trastornos por consumo de sus-

tancias). La activación anómala en los diferentes diagnósticos fue evidente en la corteza prefrontal izquierda y en la ínsula anterior, la corteza prefrontal ventrolateral derecha, el surco intraparietal derecho y el área motora cingulada media/presuplementaria. También se observaron anomalías en racimos (*clusters*) más anteriores a la corteza cingulada dorsal, que se solapaba con una red de alteraciones que los autores reportaron anteriormente en un meta-análisis transdiagnóstico del volumen de la sustancia gris.

**Conclusiones:** Estos hallazgos demuestran un patrón común de alteraciones en trastornos psiquiátricos mayores que es paralelo a la «red multi-demanda» que se observa en la cognición intacta. Dicha red interactúa con la «red de saliencia» o insular-cingular-anterior que se ha demostrado que es vulnerable a la reducción de la sustancia gris en los diferentes diagnósticos. De este modo, las redes intrínsecas a la cognición adaptable y flexible son vulnerables a la psicopatología de amplio espectro. La disfunción en estas redes puede reflejar un fenotipo transdiagnóstico intermedio, que podría adaptarse para avanzar la terapéutica.

(*Am J Psychiatry* 2017; 174:676–685)



# Riesgos endógeno y relacionado con los antipsicóticos de diabetes mellitus en personas jóvenes con esquizofrenia: Un estudio de cohorte danés basado en la población

Anto P. Rajkumar, M.D., D.N.B., M.R.C.Psych., Ph.D., Henriette Thisted Horsdal, M.Sc., Ph.D., Theresa Wimberley, M.Sc., Dan Cohen, M.D., Ph.D., Ole Mors, M.D., Ph.D., Anders D. Børghlum, M.D., Ph.D., Christiane Gasse, R.Pharm., Dr.Rer.Medic.

**Objetivo:** La diabetes mellitus contribuye a las excesivas muertes cardiovasculares y la reducida esperanza de vida en esquizofrenia. En este estudio de cohorte basado en la población se investigó el riesgo endógeno de diabetes en esquizofrenia para la que nunca se han tomado antipsicóticos, y se evaluaron los riesgos añadidos por el inicio del tratamiento con antipsicóticos en personas con esquizofrenia.

**Método:** En el estudio se hizo seguimiento de todas las personas nacidas en Dinamarca en o después del 1 de enero de 1977 hasta el 1 de enero de 2013 (N=2.736.510). El Registro Central Danés de Investigación Psiquiátrica confirmó los diagnósticos de esquizofrenia. El Registro Nacional Danés de Prescripciones brindó datos sobre las prescripciones de antipsicóticos. La diabetes fue confirmada por parte del Registro Nacional Danés de Pacientes y por el Registro Nacional Danés de Prescripciones. Los autores estimaron los riesgos de diabetes endógeno y relacionado con los antipsicóticos, utilizando los modelos de regresión de los riesgos proporcionales de Cox, explicando las posibles variables de confusión.

**Resultados:** De los miembros de la cohorte, 14.118 (0,52%) desarrollaron diabetes y 8.945 (0,33%) desarrollaron esquizofrenia durante el seguimiento (49.582.279 persona-años) El cociente de riesgo (*hazard ratio*) ajustado para la diabetes

fue 3,07 (intervalo de confianza [IC] del 95%: 1,71–5,41) en esquizofrenia sin tratamiento con antipsicóticos comparado con la población general. El riesgo de diabetes después de empezar el tratamiento con antipsicóticos fue significativamente más alto (cociente de riesgo ajustado: 3,64; IC 95%: 1,95–6,82) que el riesgo en esquizofrenia sin tratamiento con antipsicóticos, después de ajustarlo por historial familiar de diabetes y otras variables de confusión potenciales. El tratamiento de primera línea con antipsicóticos de primera generación (cociente de riesgo ajustado: 3,06; IC 95%: 1,32–7,05) o de segunda generación (cociente de riesgo ajustado: 3,44; IC 95%: 1,73–6,83) aumentó el riesgo de diabetes sin una diferencia significativa estadísticamente. Análisis de sensibilidad adecuados, limitados a la diabetes de tipo 2 corroboraron estos resultados

**Conclusiones:** La esquizofrenia confiere un alto riesgo endógeno de diabetes, y el riesgo se ve aumentado por antipsicóticos tanto de primera como de segunda generación. La detección temprana y el tratamiento efectivo de la diabetes debería ser una parte integral del manejo multidisciplinar de la esquizofrenia, independiente de la exposición a medicamentos antipsicóticos.

(*Am J Psychiatry* 2017; 174:686–694)
